# Supplementary material
Source: ML conference proceedings conference paper supplement (https://proceedings.mlr.press/v108/xie20a.html)
Supplement: Supplementary file [file xie20a-supp.pdf]

## Supplementary Material

Supplementary material for the paper: "Linear Convergence of Adaptive Stochastic Gradient Descent".

This appendix is organized as follows:

- Appendix A: Proof of Theorem 1 in the Stochastic Setting
- Appendix B: Proof of Theorem 2 and 3 in the batch Setting
- Appendix C: Proof of Lemmas in Stage I
- Appendix D: Proof of Lemmas in Stage II
- Appendix E: More Numerical Experiments

### A Proof of Theorem 1 in the Stochastic Setting

From Lemma 1, let  $C = \eta L$ , after  $N \geq \frac{\eta^2 L^2 - b_0^2}{\alpha \gamma \epsilon} + \frac{\delta}{\gamma}$  steps, if  $\min_{0 \leq i \leq N-1} \|\mathbf{x}_i - \mathbf{x}^*\|^2 > \epsilon$ , then with high probability  $1 - \exp(-\frac{\delta^2}{2(N\gamma(1-\gamma)+\delta)})$ ,  $b_N > \eta L$ . Then, there exists a first index  $k_0 < N$ , s.t.  $b_{k_0} > \eta L$  but  $b_{k_0-1} < \eta L$ . If  $k_0 \geq 1$ , then

$$\begin{aligned}
\|\mathbf{x}_{k_0+l} - \mathbf{x}^*\|^2 &= \|\mathbf{x}_{k_0-1+l} - \mathbf{x}^*\|^2 + \frac{\eta^2}{b_{k_0+l}^2} \|G_{k_0-1+l}\|^2 - \frac{2\eta}{b_{k_0+l}} \langle \mathbf{x}_{k_0-1+l} - \mathbf{x}^*, G_{k_0-1+l} \rangle \\
&\leq \|\mathbf{x}_{k_0-1+l} - \mathbf{x}^*\|^2 + \left( \frac{\eta^2 L}{b_{k_0+l}^2} - \frac{2\eta}{b_{k_0+l}} \right) \langle \mathbf{x}_{k_0-1+l} - \mathbf{x}^*, G_{k_0-1+l} \rangle \\
&\leq \|\mathbf{x}_{k_0-1+l} - \mathbf{x}^*\|^2 - \frac{\eta}{b_{k_0+l}} \langle \mathbf{x}_{k_0-1+l} - \mathbf{x}^*, G_{k_0-1+l} \rangle \\
&\leq \|\mathbf{x}_{k_0-1+l} - \mathbf{x}^*\|^2 - \frac{\eta}{b_{\max}} \langle \mathbf{x}_{k_0-1+l} - \mathbf{x}^*, G_{k_0-1+l} \rangle
\end{aligned} \tag{1}$$

where the last second inequality is from the condition  $b_{k_0} > \eta L$ . The last inequality holds since  $b_{k_0+l} \leq b_{\max}$  and  $f_{\xi_{k_0-1+l}}(\mathbf{x})$  is convex, which implies  $\langle \mathbf{x}_{k_0-1+l} - \mathbf{x}^*, G_{k_0-1+l} - \nabla f_{\xi_{k_0-1+l}}(\mathbf{x}^*) \rangle \geq 0$ ,  $\mathbb{P}(\nabla f_{\xi_{k_0-1+l}}(\mathbf{x}^*) = \mathbf{0}) = 1$  by Assumption (A4).

Take expectation regarding to  $\xi_{k_0-1+l}$ , and use the fact that when  $j > k_0$ ,  $b_j > L$ , when  $l \geq 1$  and  $0 < \frac{\mu\eta}{b_{k_0-1+l}} < \frac{\mu}{L} < 1$ , then we can get

$$\begin{aligned}
\mathbb{E}_{\xi_{k_0-1+l}} \|\mathbf{x}_{k_0+l} - \mathbf{x}^*\|^2 &\leq \|\mathbf{x}_{k_0-1+l} - \mathbf{x}^*\|^2 - \frac{\eta}{b_{\max}} \langle \mathbf{x}_{k_0-1+l} - \mathbf{x}^*, \nabla F(\mathbf{x}_{k_0-1+l}) \rangle \\
&\leq \left(1 - \frac{\mu\eta}{b_{\max}}\right) \|\mathbf{x}_{k_0-1+l} - \mathbf{x}^*\|^2 \\
&\leq \prod_{j=0}^l \left(1 - \frac{\mu\eta}{b_{\max}}\right) \|\mathbf{x}_{k_0-1} - \mathbf{x}^*\|^2 \\
&\leq \prod_{j=0}^l \left(1 - \frac{\mu\eta}{b_{\max}}\right) (\|\mathbf{x}_0 - \mathbf{x}^*\|^2 + \eta^2 (\log(\frac{C^2}{b_0^2}) + 1)) \\
&\leq (\|\mathbf{x}_0 - \mathbf{x}^*\|^2 + \eta^2 (\log(\frac{\eta^2 L^2}{b_0^2}) + 1)) \exp\left(-\frac{\mu l}{b_{\max}}\right)
\end{aligned} \tag{2}$$

where the second inequality is from the strong convexity of  $F(\mathbf{x})$ , i.e.  $\langle \mathbf{x} - \mathbf{y}, \nabla F(\mathbf{x}) - \nabla F(\mathbf{y}) \rangle \geq \mu \|\mathbf{x} - \mathbf{y}\|^2$  and  $\nabla F(\mathbf{x}^*) = \mathbf{0}$ . From Lemma 4, we can give an upper bound for  $b_{\max} = \max_{l \geq 0} b_{k_0+l} = C + \frac{L}{\eta} (\|\mathbf{x}_0 - \mathbf{x}^*\|^2 + \eta^2 (\log(\frac{C^2}{b_0^2}) + 1)) = \eta L + \frac{L}{\eta} (\|\mathbf{x}_0 - \mathbf{x}^*\|^2 + \eta^2 (\log(\frac{\eta^2 L^2}{b_0^2}) + 1))$ .

Then, take the iterated expectation and use Markov in inequality, with high probability  $1 - \delta_h$ ,

$$\|\mathbf{x}_{k_0+l} - \mathbf{x}^*\|^2 \leq \frac{1}{\delta_h} (\|\mathbf{x}_0 - \mathbf{x}^*\|^2 + \eta^2 (\log \frac{\eta^2 L^2}{b_0^2} + 1)) \exp(-\frac{\mu l}{b_{\max}})$$

Then, after  $M \geq \frac{\eta L + \frac{L}{\eta} (\|\mathbf{x}_0 - \mathbf{x}^*\|^2 + \eta^2 (\log \frac{\eta^2 L^2}{b_0^2} + 1))}{\mu} \log \frac{\|\mathbf{x}_0 - \mathbf{x}^*\|^2 + \eta^2 (\log \frac{\eta^2 L^2}{b_0^2} + 1)}{\epsilon \delta_h}$  iterations, with high probability more than  $1 - \delta_h - \exp(-\frac{\delta^2}{2(N\gamma(1-\gamma)+\delta)})$

$$\|\mathbf{x}_{k_0+M} - \mathbf{x}^*\|^2 \leq \epsilon$$

Otherwise, if  $k_0 = 0$ , i.e.  $b_0 > \eta L$ , then we use the same inequality as above,

$$\mathbb{E}_{\xi_{M-1}} \|\mathbf{x}_M - \mathbf{x}^*\|^2 \leq (1 - \frac{\mu}{b'_{\max}}) \|\mathbf{x}_{M-1} - \mathbf{x}^*\|^2 \leq \|\mathbf{x}_0 - \mathbf{x}^*\|^2 \exp(-\frac{\mu M}{b'_{\max}})$$

Then, after  $M \geq \frac{b'_{\max}}{\mu} \log \frac{\|\mathbf{x}_0 - \mathbf{x}^*\|^2}{\epsilon \delta_h}$  iterations, by Markov's inequality,

$$\mathbb{P}(\|\mathbf{x}_M - \mathbf{x}^*\|^2 \geq \epsilon) \leq \frac{\mathbb{E} \|\mathbf{x}_M - \mathbf{x}^*\|^2}{\epsilon} \leq \delta_h$$

where  $b'_{\max} = b_0 + \frac{L}{\eta} \|\mathbf{x}_0 - \mathbf{x}^*\|^2$  is derived as follows:

$$\begin{aligned} \|\mathbf{x}_{j+1} - \mathbf{x}^*\|^2 &\leq \|\mathbf{x}_j - \mathbf{x}^*\|^2 - \frac{\eta}{L} \frac{\|G_j\|^2}{b_{j+1}} \\ &\leq \|\mathbf{x}_0 - \mathbf{x}^*\|^2 - \frac{\eta}{L} \sum_{i=0}^j \frac{\|G_i\|^2}{b_{i+1}} \end{aligned}$$

Then, for any  $j + 1$ :

$$b_{j+1} = b_0 + \sum_{i=0}^j \frac{\|G_i\|^2}{b_i + b_{i+1}} \leq b_0 + \frac{L}{\eta} (\|\mathbf{x}_0 - \mathbf{x}^*\|^2 - \|\mathbf{x}_{j+1} - \mathbf{x}^*\|^2) \quad (3)$$

Plugging in the value, we can get  $M \geq \frac{b_0 + \frac{L}{\eta} \|\mathbf{x}_0 - \mathbf{x}^*\|^2}{\mu} \log \frac{\|\mathbf{x}_0 - \mathbf{x}^*\|^2}{\epsilon \delta_h}$ .

## B Proof of Theorem 2 and 3 in the batch Setting

### B.1 Proof of Theorem 2

**Lemma B1. (Co-coercivity with Strong Convexity)** (Bubeck et al., 2015) *If  $F(\mathbf{x})$  is  $\mu$ -strongly convex and  $L$ -smooth, then*

$$\langle \nabla F(\mathbf{x}) - \nabla F(\mathbf{y}), \mathbf{x} - \mathbf{y} \rangle \geq \frac{\mu L}{\mu + L} \|\mathbf{x} - \mathbf{y}\|^2 + \frac{1}{\mu + L} \|\nabla F(\mathbf{x}) - \nabla F(\mathbf{y})\|^2$$

*Proof.* Let  $\phi(\mathbf{x}) = F(\mathbf{x}) - \frac{\mu}{2} \|\mathbf{x}\|^2$ , then  $\phi(\mathbf{x})$  is convex and  $(L - \mu)$ -smooth. By Lemma C4,

$$\langle \nabla \phi(\mathbf{x}) - \nabla \phi(\mathbf{y}), \mathbf{x} - \mathbf{y} \rangle \geq \frac{1}{L - \mu} \|\nabla \phi(\mathbf{x}) - \nabla \phi(\mathbf{y})\|^2$$

Plugging in  $\nabla \phi(\mathbf{x}) = \nabla F(\mathbf{x}) - \mu \mathbf{x}$ , we have

$$\begin{aligned} \langle \nabla F(\mathbf{x}) - \nabla F(\mathbf{y}), \mathbf{x} - \mathbf{y} \rangle - \mu \|\mathbf{x} - \mathbf{y}\|^2 &\geq \frac{1}{L - \mu} (\|\nabla F(\mathbf{x}) - \nabla F(\mathbf{y})\|^2 + \mu^2 \|\mathbf{x} - \mathbf{y}\|^2) \\ &\quad - 2\mu \langle \nabla F(\mathbf{x}) - \nabla F(\mathbf{y}), \mathbf{x} - \mathbf{y} \rangle \end{aligned}$$

With simple algebra, we can get the result. □

By Lemma 2, after  $N = \left\lceil \frac{\log(\eta^2(\mu+L)^2/4b_0^2)}{\log(1+4\mu^2\epsilon/(\mu+L)^2)} \right\rceil + 1$  iterations, if  $\min_{0 \leq i \leq N-1} \|\mathbf{x}_i - \mathbf{x}^*\|^2 > \epsilon$ , then  $\exists k_0 \leq N$ , such that  $k_0$  is the first index s.t.  $b_{k_0} > \eta \frac{\mu+L}{2}$ .

If  $k_0 > 1$ , since  $F(\mathbf{x})$  is  $\mu$ -strongly convex and  $L$ -smooth, by Lemma B1,

$$\langle \nabla F(\mathbf{x}) - \nabla F(\mathbf{y}), \mathbf{x} - \mathbf{y} \rangle \geq \frac{\mu L}{\mu + L} \|\mathbf{x} - \mathbf{y}\|^2 + \frac{1}{\mu + L} \|\nabla F(\mathbf{x}) - \nabla F(\mathbf{y})\|^2.$$

For  $j \geq 0$ , we have  $0 < \eta \frac{2\mu L}{\mu+L} \frac{1}{b_{k_0+j}} < \frac{4\mu L}{(\mu+L)^2} < 1$ , since  $2\mu L < \mu^2 + L^2$ .

We divide the analysis into two situations to get a better bound instead of using  $b_{\max}$  for all the following steps, which is different from the proof of Theorem 1. First, assume that  $\eta \frac{\mu+L}{2} < b_{k_0} < \eta L$  and after another  $l$  iterations,  $b_{k_0+l}$  is still less than  $\eta L$ , then  $\|\mathbf{x}_{k_0+l} - \mathbf{x}^*\|^2$  is bounded as follows:

$$\begin{aligned} \|\mathbf{x}_{k_0+l} - \mathbf{x}^*\|^2 &= \|\mathbf{x}_{k_0-1+l} - \mathbf{x}^*\|^2 + \frac{\eta^2}{b_{k_0+l}^2} \|\nabla F(\mathbf{x}_{k_0-1+l})\|^2 \\ &\quad - \frac{2\eta}{b_{k_0+l}} \langle \mathbf{x}_{k_0-1+l} - \mathbf{x}^*, \nabla F(\mathbf{x}_{k_0-1+l}) \rangle \\ &\leq \left(1 - \frac{2\mu\eta L}{(\mu+L)b_{k_0+l}}\right) \|\mathbf{x}_{k_0-1+l} - \mathbf{x}^*\|^2 \\ &\quad + \frac{\eta}{b_{k_0+l}} \left(\frac{\eta}{b_{k_0+l}} - \frac{2}{\mu+L}\right) \|\nabla F(\mathbf{x}_{k_0-1+l})\|^2 \\ &\leq \prod_{j=0}^l \left(1 - \frac{2\mu\eta L}{(\mu+L)b_{k_0+j}}\right) \|\mathbf{x}_{k_0-1} - \mathbf{x}^*\|^2 \\ &\leq \exp\left(-\sum_{j=0}^l \frac{2\mu\eta L}{(\mu+L)\eta L}\right) \|\mathbf{x}_{k_0-1} - \mathbf{x}^*\|^2 \\ &\leq \exp\left(-\frac{2\mu(l+1)}{\mu+L}\right) \|\mathbf{x}_{k_0-1} - \mathbf{x}^*\|^2 \end{aligned}$$

where  $\|\mathbf{x}_{k_0-1} - \mathbf{x}^*\|^2$  can be upper bounded according to Lemma 3 with  $C = \frac{\mu+L}{2}$ :

$$\|\mathbf{x}_{k_0-1} - \mathbf{x}^*\|^2 \leq \|\mathbf{x}_0 - \mathbf{x}^*\|^2 + \eta^2 \left(\log\left(\frac{(\mu+L)^2}{4b_0^2}\right) + 1\right)$$

Second, if  $b_{k_0+M_0} > \eta L$ ,  $M_0$  can be  $0, 1, 2, \dots$ , then for  $l \geq 0$ ,

$$\begin{aligned} \|\mathbf{x}_{k_0+M_0+l} - \mathbf{x}^*\|^2 &= \|\mathbf{x}_{k_0+M_0-1+l} - \mathbf{x}^*\|^2 + \frac{\eta^2}{b_{k_0+l}^2} \|\nabla F(\mathbf{x}_{k_0+M_0-1+l})\|^2 \\ &\quad - \frac{2\eta}{b_{k_0+M_0+l}} \langle \mathbf{x}_{k_0+M_0-1+l} - \mathbf{x}^*, \nabla F(\mathbf{x}_{k_0+M_0-1+l}) \rangle \\ &\leq \|\mathbf{x}_{k_0+M_0-1+l} - \mathbf{x}^*\|^2 + \left(\frac{\eta^2 L}{b_{k_0+M_0+l}^2} - \frac{2\eta}{b_{k_0+M_0+l}}\right) \langle \mathbf{x}_{k_0+M_0-1+l} - \mathbf{x}^*, \nabla F(\mathbf{x}_{k_0+M_0-1+l}) \rangle \\ &\leq \left(1 - \frac{\mu\eta}{b_{\max}}\right) \|\mathbf{x}_{k_0+M_0+l} - \mathbf{x}^*\|^2 \\ &\leq \exp\left(-\frac{\mu\eta l}{b_{\max}}\right) \|\mathbf{x}_{k_0+M_0} - \mathbf{x}^*\|^2 \\ &\leq \exp\left(-\frac{\mu\eta l}{b_{\max}}\right) \exp\left(-\frac{2\mu(M_0+1)}{\mu+L}\right) \|\mathbf{x}_{k_0-1} - \mathbf{x}^*\|^2 \end{aligned}$$

where  $b_{\max}$  can be upper bounded according to Lemma 4, here  $b_{\max} \leq \eta L + \frac{L}{\eta} \|\mathbf{x}_{k_0+M_0} - \mathbf{x}^*\|^2$ .

Once  $b_t > \frac{\mu+L}{2} > \frac{L}{2}$ , by Lemma 5, AdaGrad-Norm is indeed a decent algorithm for  $\|\mathbf{x}_j - \mathbf{x}^*\|^2$ , so  $\|\mathbf{x}_{k_0+M_0-1} - \mathbf{x}^*\|^2 \leq \|\mathbf{x}_{k_0-1} - \mathbf{x}^*\|^2$ . Hence,

$$b_{\max} \leq \eta L + \frac{L}{\eta} \|\mathbf{x}_{k_0-1} - \mathbf{x}^*\|^2$$

Combining the two situations above, we have

$$\begin{aligned}\|\mathbf{x}_{k_0+M} - \mathbf{x}^*\|^2 &\leq \exp(-M \min \left\{ \frac{\mu\eta}{b_{\max}}, \frac{2\mu}{\mu+L} \right\}) \|\mathbf{x}_{k_0-1} - \mathbf{x}^*\|^2 \\ &\leq \exp(-M \min \left\{ \frac{\mu}{L(1+\Delta/\eta^2)}, \frac{2\mu}{\mu+L} \right\}) \|\mathbf{x}_{k_0-1} - \mathbf{x}^*\|^2\end{aligned}$$

where  $\Delta = \|\mathbf{x}_{k_0-1} - \mathbf{x}^*\|^2$ .

After  $M \geq \max \left\{ \frac{L(1+\Delta/\eta^2)}{\mu}, \frac{\mu+L}{2\mu} \right\} \log \frac{\Delta}{\epsilon} - 1$  iterations,

$$\|\mathbf{x}_{k_0+M} - \mathbf{x}^*\|^2 \leq \epsilon$$

Otherwise, if  $k_0 = 1$ , then

$$\|\mathbf{x}_M - \mathbf{x}^*\|^2 \leq \exp\left(-\sum_{j=1}^M \min \left\{ \frac{\mu\eta}{b'_{\max}}, \frac{2\mu}{\mu+L} \right\}\right) \|\mathbf{x}_0 - \mathbf{x}^*\|^2$$

where  $b'_{\max} = \eta L + \frac{L}{\eta} \|\mathbf{x}_0 - \mathbf{x}^*\|^2$ .

Then, after  $M \geq \max \left\{ \frac{L(1+\|\mathbf{x}_0 - \mathbf{x}^*\|^2/\eta^2)}{\mu}, \frac{\mu+L}{2\mu} \right\} \log \frac{\|\mathbf{x}_0 - \mathbf{x}^*\|^2}{\epsilon}$  iterations, we can assure that

$$\|\mathbf{x}_M - \mathbf{x}^*\|^2 \leq \epsilon$$

## B.2 Proof of Theorem 3

By Lemma 2, after  $N \geq \frac{\log(\eta^2 L^2 / b_0^2)}{\log(1+2\mu\epsilon/(\eta L)^2)}$  iterations, if  $\min_{0 \leq i \leq N-1} F(\mathbf{x}_i) - F^* > \epsilon$ , then  $\exists k_0 \leq N$ , such that  $k_0$  is the first index s.t.  $b_{k_0} > \eta L$ .

If  $k_0 > 1$ , then for  $j \geq 0$ , from Assumption (A2), we have

$$\begin{aligned}F(\mathbf{x}_{k_0+j}) &\leq F(\mathbf{x}_{k_0+j-1}) - \frac{\eta}{b_{k_0+j}} \left(1 - \frac{\eta L}{2b_{k_0+j}}\right) \|\nabla F(\mathbf{x}_{k_0+j-1})\|^2 \\ &\leq F(\mathbf{x}_{k_0+j-1}) - \frac{\eta}{2b_{k_0+j}} \|\nabla F(\mathbf{x}_{k_0+j-1})\|^2 \\ &\leq F(\mathbf{x}_{k_0+j-1}) + \frac{\mu\eta}{b_{k_0+j}} (F^* - F(\mathbf{x}_{k_0+j-1}))\end{aligned}\tag{4}$$

The last inequality is from  $\mu$ -PL inequality (Assumption (A1b)):  $-\|F(\mathbf{x})\|^2 \leq 2\mu(F^* - F(\mathbf{x}))$ ,  $\forall \mathbf{x}$ . Then, add  $-F^*$  on both sides, we can get

$$F(\mathbf{x}_{k_0+j}) - F^* \leq \left(1 - \frac{\mu\eta}{b_{k_0+j}}\right) (F(\mathbf{x}_{k_0+j-1}) - F^*)\tag{5}$$

Since  $b_{k_0+j} > \eta L \geq \eta\mu$ ,  $1 - \frac{\mu\eta}{b_{k_0+j}} \in (0, 1)$  holds for all  $j \geq 0$ , it is a contraction at every step. Then,

$$\begin{aligned}F(\mathbf{x}_{k_0+j}) - F^* &\leq \left(\prod_{l=0}^j \left(1 - \frac{\mu\eta}{b_{k_0+l}}\right)\right) (F(\mathbf{x}_{k_0-1}) - F^*) \\ &\leq \exp\left(-\sum_{l=0}^j \frac{\mu\eta}{b_{k_0+l}}\right) (F(\mathbf{x}_{k_0-1}) - F^*) \\ &\leq \exp\left(-\sum_{l=0}^j \frac{\mu\eta}{b_{k_0+l}}\right) (F(\mathbf{x}_0) - F^* + \frac{\eta^2 L}{2} (1 + \log(\frac{b_{k_0-1}^2}{b_0^2})))\end{aligned}\tag{6}$$

where we use the fact that  $1 - x \leq e^{-x}$ ,  $\forall x \in (0, 1)$  and the lemma in Ward et al. (2018):  $F(\mathbf{x}_{k_0-1}) \leq F(\mathbf{x}_0) + \frac{\eta^2 L}{2} (1 + \log(\frac{b_{k_0-1}^2}{b_0^2}))$ .

The upper bound of  $b_j$  is also from Ward et al. (2018):

$$b_{\max} = b_{k_0-1} + \frac{2}{\eta} (F_{k_0-1} - F^*) \leq \eta L + \frac{2}{\eta} (F(\mathbf{x}_0) - F^* + \frac{\eta^2 L}{2} (1 + \log(\frac{\eta^2 L^2}{b_0^2})))\tag{7}$$

Then,

$$F(\mathbf{x}_{k_0+M-1}) - F^* \leq \exp\left(-\frac{\mu\eta M}{b_{\max}}\right)(F(\mathbf{x}_0) - F^* + \frac{\eta^2 L}{2}(1 + 2\log \frac{\eta L}{b_0}))$$

Hence, we need

$$M \geq \frac{b_{\max}}{\mu\eta} \log \frac{F(\mathbf{x}_0) - F^* + \frac{\eta^2 L}{2}(1 + 2\log \frac{\eta L}{b_0})}{\epsilon}$$

It is sufficient that

$$M \geq \frac{\eta L + \frac{2}{\eta}(F(\mathbf{x}_0) - F^* + \frac{\eta^2 L}{2}(1 + \log \frac{\eta^2 L^2}{b_0^2}))}{\mu\eta} \log \frac{F(\mathbf{x}_0) - F^* + \frac{\eta^2 L}{2}(1 + 2\log \frac{\eta L}{b_0})}{\epsilon}$$

Then,

$$\min_{0 \leq i \leq N+M-1} F(\mathbf{x}_i) - F^* \leq \epsilon$$

where  $N = \left\lceil \frac{\log(\eta^2 L^2 / b_0^2)}{\log(1 + 2\mu\epsilon / (\eta L)^2)} \right\rceil + 1$ .

Otherwise, if  $k_0 = 1$ , the upper bound of  $b_j$  degenerates to

$$b'_{\max} = b_0 + \frac{2}{\eta}(F(\mathbf{x}_0) - F^*)$$

Then, using the same procedure, we have

$$\begin{aligned} F(\mathbf{x}_M) - F^* &\leq \exp\left(-\sum_{k=0}^{M-1} \frac{\mu\eta}{b_{k+1}}\right)(F(\mathbf{x}_0) - F^*) \\ &\leq \exp\left(\frac{-\mu\eta M}{b_{\max}}\right)(F(\mathbf{x}_0) - F^*) \end{aligned} \quad (8)$$

Once the number of iterations satisfies

$$M \geq \frac{b'_{\max}}{\mu\eta} \log \frac{F(\mathbf{x}_0) - F^*}{\epsilon} = \frac{b_0 + \frac{2}{\eta}(F(\mathbf{x}_0) - F^*)}{\mu\eta} \log \frac{F(\mathbf{x}_0) - F^*}{\epsilon}$$

we can get the expected result:  $F(\mathbf{x}_M) - F^* \leq \epsilon$ .

## C Proof of Lemmas in Stage I

### C.1 Proof of Lemma 1

**Lemma C2. (Bernstein's Inequality)** (Wainwright, 2019) Let  $X$  be a random variable,  $\mathbb{E}[X] = \mu$ ,  $\text{Var}(X) = \sigma^2$ , if  $X$  satisfies Bernstein condition with parameter  $b > 0$ , i.e. if  $|\mathbb{E}(X - \mu)^k| \leq \frac{1}{2}k!\sigma^2 b^{k-2}, \forall k \geq 2$ , then

$$\mathbb{P}(|X - \mu| \geq t) \leq 2 \exp\left(-\frac{t^2}{2(\sigma^2 + bt)}\right)$$

**Lemma C3.** (Wainwright, 2019) Let  $X_i \sim \text{Bernoulli}(p)$ , i.i.d.  $\forall i = 1, 2, \dots, n$ , and  $X = \sum_{i=1}^n X_i$ . Since  $X_i \in [0, 1]$ ,  $\{X_i\}$  satisfy Bernstein condition, then

$$\mathbb{P}(|X - np| > t) \leq 2 \exp\left(-\frac{t^2}{2(np(1-p) + t)}\right)$$

**Proof of Lemma 1** If  $\min_j \|\mathbf{x}_j - \mathbf{x}^*\|^2 \leq \epsilon$ , we are done.

Otherwise, we have  $\|\mathbf{x}_j - \mathbf{x}^*\|^2 > \epsilon, \forall j = 0, 1, 2, \dots, N$ . Assume that  $F(\mathbf{x})$  satisfies  $(\epsilon, \alpha, \gamma)$ -RUIG (Assumption (A3)), we can use independent identical Bernoulli random variables  $\{Z_j\}$  to represent them with the following distribution:

$$Z_j = \begin{cases} 1 & \text{if } \|\nabla f_{\xi_j}(\mathbf{x}_j)\|^2 \geq \alpha \|\mathbf{x}_j - \mathbf{x}^*\|^2 \\ 0 & \text{else} \end{cases} \quad (9)$$

where  $\mathbb{P}(Z_j = 1) = \gamma, \forall j$ . Note that the RUIG assumption is for any fixed  $x$  (conditional on  $\mathbf{x}$ ), the probability distribution is over the random variable  $i$  (or  $\xi_i$ ) (but not over  $\mathbf{x}$ ). Every index  $\xi_i$  is sampled independently and uniformly at each iteration, so random variables  $\{Z_i\}$  are independent. Then, from Lemma C3 and let  $Z = \sum_j Z_j$ , with high probability bigger than  $1 - \exp(-\frac{\delta^2}{2(N\gamma(1-\gamma)+\delta)})$ ,  $Z \geq \gamma N - \delta, \forall N$ . Thus, after  $N \geq \frac{C^2 - b_0^2}{\alpha\gamma\epsilon} + \frac{\delta}{\gamma}$  iterations, with  $1 - \exp(-\frac{\delta^2}{2(N\gamma(1-\gamma)+\delta)})$ , we have

$$b_N^2 = b_0^2 + \sum_{i=0}^{N-1} \|\nabla f_{\xi_i}(\mathbf{x}_i)\|^2 > b_0^2 + (\gamma N - \delta)\alpha\epsilon \geq C^2$$

Note that even if in the case that there is some correlation between Bernoulli random variables, since each of them is sub-Gaussian with  $\sigma = 0.5$ , then the upper bound of the sub-Gaussian parameter of the sum of them is  $0.5N$ , so the worst-case variance is  $0.25N^2$ . Hence, the result still holds under this setting.

## C.2 Proof of Lemma 2

(a) If  $b_0 > C$ , we are done.

Otherwise if  $b_0 < C$ , and after  $N \geq \frac{\log(C^2/b_0^2)}{\log(1+\mu^2\epsilon/C^2)}$  iterations,  $b_N < C$  and  $\min_{0 \leq i \leq N-1} \|\mathbf{x}_i - \mathbf{x}^*\|^2 > \epsilon$ . Since  $F(\mathbf{x})$  is  $\mu$ -strongly convex,  $\epsilon < \|\mathbf{x}_i - \mathbf{x}^*\|^2 \leq \frac{1}{\mu^2} \|\nabla F(\mathbf{x}_i) - \nabla F(\mathbf{x}^*)\|^2, \forall \mathbf{x}_i$  and  $\nabla F(\mathbf{x}^*) = \mathbf{0}$ . Then,

$$\begin{aligned} b_N^2 &= b_{N-1}^2 + \|\nabla F(\mathbf{x}_{N-1})\|^2 \\ &= b_{N-1}^2 \left(1 + \frac{\|\nabla F(\mathbf{x}_{N-1})\|^2}{b_{N-1}^2}\right) \\ &\geq b_0^2 \prod_{j=0}^{N-1} \left(1 + \frac{\|\nabla F(\mathbf{x}_j)\|^2}{b_j^2}\right) \\ &\geq b_0^2 \left(1 + \frac{\mu^2\epsilon}{C^2}\right)^N \geq C^2 \end{aligned} \tag{10}$$

Contradiction! Hence, at least one of  $\min_{0 \leq i \leq N-1} \|\mathbf{x}_i - \mathbf{x}^*\|^2 \leq \epsilon$  or  $b_N > C$  holds. When  $\mu$  is small and  $C$  is big, we have  $\log(1 + \frac{\mu^2\epsilon}{C^2}) \approx \frac{\mu^2\epsilon}{C^2}$ .

(b) With PL inequality  $\frac{1}{2\mu} \|\nabla F(\mathbf{x})\|^2 \geq F(\mathbf{x}) - F(\mathbf{x}^*)$  instead of  $\mu$ -strongly convex assumption, if  $\min_{0 \leq i \leq N-1} F(\mathbf{x}_i) - F^* > \epsilon$  and  $b_N < C$ , then after  $N \geq \frac{\log(C^2/b_0^2)}{\log(1+2\mu\epsilon/C^2)}$  iterations,  $b_N^2 \geq b_0^2(1 + \frac{2\mu\epsilon}{C^2})^N \geq C^2$ , contradiction! Hence, either  $\min_{0 \leq i \leq N-1} F(\mathbf{x}_i) - F^* \leq \epsilon$  or  $b_N > C$ .

## C.3 Proof of Lemma 3

**Lemma C4. (Co-coercivity)** (Needell et al., 2016) For a  $L$ -smooth convex function  $F(\mathbf{x})$ ,  $\forall \mathbf{x}, \mathbf{y}$

$$\|\nabla F(\mathbf{x}) - \nabla F(\mathbf{y})\|^2 \leq L\langle \mathbf{x} - \mathbf{y}, \nabla F(\mathbf{x}) - \nabla F(\mathbf{y}) \rangle$$

**Lemma C5. (Integral lemma)** (Ward et al., 2018) For any non-negative sequence  $a_1, \dots, a_T$ , such that  $a_1 \geq 1$ ,

$$\sum_{l=1}^T \frac{a_l}{\sum_{i=1}^l a_i} \leq \log\left(\sum_{i=1}^T a_i\right) + 1 \tag{11}$$

$$\sum_{l=1}^T \frac{a_l}{\sqrt{\sum_{i=1}^l a_i}} \leq 2\sqrt{\sum_{i=1}^T a_i} \tag{12}$$

*Proof.* The lemma can be proved by induction. Besides, we can take above sums as Riemman sums, then the sums should be proportional to integrals,  $\log(x)$  and  $2\sqrt{x}$ , respectively.  $\square$

**Proof of Lemma 3** With above two lemmas, we can bound  $\|\mathbf{x}_{J-1} - \mathbf{x}^*\|^2$  as follows:

$$\begin{aligned}
\|\mathbf{x}_{J-1} - \mathbf{x}^*\|^2 &= \|\mathbf{x}_{J-2} - \frac{\eta G_{J-2}}{b_{J-1}} - \mathbf{x}^*\|^2 \\
&= \|\mathbf{x}_{J-2} - \mathbf{x}^*\|^2 + \|\frac{\eta G_{J-2}}{b_{J-1}}\|^2 - 2\eta \langle \frac{G_{J-2}}{b_{J-1}}, \mathbf{x}_{J-2} - \mathbf{x}^* \rangle \\
&\leq \|\mathbf{x}_{J-2} - \mathbf{x}^*\|^2 + \|\frac{\eta G_{J-2}}{b_{J-1}}\|^2 - \frac{2\eta}{b_{J-1}L} \|G_{J-2} - \nabla f_{\xi_{J-2}}(\mathbf{x}^*)\|^2 \\
&\leq \|\mathbf{x}_{J-2} - \mathbf{x}^*\|^2 + \frac{\eta^2 \|G_{J-2}\|^2}{b_{J-1}^2} \\
&\leq \|\mathbf{x}_0 - \mathbf{x}^*\|^2 + \eta^2 \sum_{j=0}^{J-2} \frac{\|G_j\|^2}{b_{j+1}^2} \\
&\leq \|\mathbf{x}_0 - \mathbf{x}^*\|^2 + \eta^2 \sum_{j=0}^{J-2} \frac{\|G_j\|^2 / b_0^2}{\sum_{l=0}^j \|G_l\|^2 / b_0^2} \\
&\leq \|\mathbf{x}_0 - \mathbf{x}^*\|^2 + \eta^2 (\log(\sum_{j=0}^{J-2} \|G_j\|^2 / b_0^2) + 1) \\
&\leq \|\mathbf{x}_0 - \mathbf{x}^*\|^2 + \eta^2 (\log \frac{C^2}{b_0^2} + 1)
\end{aligned}$$

where the first inequality is from the co-coercivity (Lemma C4) and Assumption (A4)  $\mathbb{P}(\nabla f_{\xi_{J-2}}(\mathbf{x}^*) = \mathbf{0}) = 1$ ; last second inequality is from lemma C5 and the last inequality is from the assumption that  $J$  is the first index s.t.  $b_J > C$ .

## D Proof of Lemmas in Stage II

### D.1 Proof of Lemma 4

Since  $b_J > \eta L$ , we have the following bound for  $\|\mathbf{x}_{J+l} - \mathbf{x}^*\|^2$ :

$$\begin{aligned}
\|\mathbf{x}_{J+l} - \mathbf{x}^*\|^2 &= \|\mathbf{x}_{J+l-1} - \mathbf{x}^*\|^2 + \frac{\eta^2 \|G_{J+l-1}\|^2}{b_{J+l}^2} \\
&\quad - \frac{2\eta}{b_{J+l}} \langle G_{J+l-1} - \nabla f_{\xi_{J+l-1}}(\mathbf{x}^*), \mathbf{x}_{J+l-1} - \mathbf{x}^* \rangle \\
&\leq \|\mathbf{x}_{J+l-1} - \mathbf{x}^*\|^2 + \|\frac{\eta G_{J+l-1}}{b_{J+l}}\|^2 - \frac{2\eta}{b_{J+l}L} \|G_{J+l-1} - \nabla f_{J+l-1}(\mathbf{x}^*)\|^2 \\
&\leq \|\mathbf{x}_{J+l-1} - \mathbf{x}^*\|^2 + \frac{\eta}{b_{J+l}} (\frac{\eta}{b_{J+l}} - \frac{2}{L}) \|G_{J+l-1}\|^2 \\
&\leq \|\mathbf{x}_{J+l-1} - \mathbf{x}^*\|^2 - \frac{\eta}{L} \frac{\|G_{J+l-1}\|^2}{b_{J+l}} \\
&\leq \|\mathbf{x}_{J-1} - \mathbf{x}^*\|^2 - \frac{\eta}{L} \sum_{j=0}^l \frac{\|G_{J+j-1}\|^2}{b_{J+j}}
\end{aligned} \tag{13}$$

inequalities are from  $f_{\xi_{J+l-1}}(\mathbf{x})$  is  $L$ -smooth (Assumption (A2)) and co-coercivity (Lemma C4). Then, we have the bound of the sum:

$$\sum_{j=0}^l \frac{\|G_{J+j-1}\|^2}{b_{J+j}} \leq \frac{L}{\eta} (\|\mathbf{x}_{J-1} - \mathbf{x}^*\|^2 - \|\mathbf{x}_{J+l} - \mathbf{x}^*\|^2) \tag{14}$$

Therefore,  $b_{\max}$  is bounded as follows:

$$\begin{aligned}
 b_{J+l} &= b_{J+l-1} + \frac{\|G_{J+l-1}\|^2}{b_{J+l} + b_{J+l-1}} \\
 &\leq b_{J-1} + \sum_{j=1}^l \frac{\|G_{J+j-1}\|^2}{b_{J+j}} \\
 &\leq C + \frac{L}{\eta} \|\mathbf{x}_{J-1} - \mathbf{x}^*\|^2 \\
 &= C + \frac{L}{\eta} (\|\mathbf{x}_0 - \mathbf{x}^*\|^2 + \eta^2 (\log \frac{C^2}{b_0^2} + 1))
 \end{aligned} \tag{15}$$

where  $\|\mathbf{x}_{J-1} - \mathbf{x}^*\|^2 \leq \|\mathbf{x}_0 - \mathbf{x}^*\|^2 + \eta^2 (\log \frac{C^2}{b_0^2} + 1)$  is from Lemma 3.

## D.2 Proof of Lemma 5

Use similar technique as above,

$$\begin{aligned}
 \|\mathbf{x}_j - \mathbf{x}^*\|^2 &\leq \|\mathbf{x}_{j-1} - \mathbf{x}^*\|^2 + \left(\frac{\eta^2}{b_j^2} - \frac{2\eta}{b_j L}\right) \|G_{j-1}\|^2 \\
 &= \|\mathbf{x}_{j-1} - \mathbf{x}^*\|^2 - \frac{\eta}{b_j} \left(\frac{2}{L} - \frac{\eta}{b_j}\right) \|G_{j-1}\|^2 \leq \|\mathbf{x}_{j-1} - \mathbf{x}^*\|^2
 \end{aligned}$$

where the first inequality is from  $f_j(\mathbf{x})$  is  $L$ -smooth (Assumption (A2)),  $\nabla f_{j-1}(\mathbf{x}^*) = \mathbf{0}$  (Assumption (A4)) and Lemma C4. Therefore, once  $b_j > \eta L/2$ , AdaGrad-Norm is a descent algorithm.

## E More Numerical Experiments

### E.1 Numerical Experiments of AdaGrad-Norm with Extreme Initialization

In this section, we demonstrate the numerical experiments of AdaGrad-Norm with  $\mathbf{x}_0 = \mathbf{0}$  (stochastic: Figure 6; batch: Figure 9) and the extreme case (stochastic: Figure 7; batch: Figure 10):  $\mathbf{x}_0$  is far away from  $\mathbf{x}^*$  and  $\|\mathbf{x}_0\|$  is large. Then, we tune the hyperparameter  $\eta$  in the extreme case with  $\eta = \Theta(\|\mathbf{x}_0 - \mathbf{x}^*\|^2)$  (stochastic: Figure 8) and  $\eta = \Theta(\|\mathbf{x}_0 - \mathbf{x}^*\|)$  (batch: Figure 11). In these figures, the x-axis represents iteration  $t$  while y-axis is the approximation error  $\|\mathbf{x}_t - \mathbf{x}^*\|^2$  in log scale for the first and third columns and it is  $b_t$  for the second and fourth columns.

We show that when starting from  $\mathbf{x}_0 = \mathbf{0}$ , the result is close to the experiment we show in Figure 2. When initialize  $\mathbf{x}_0$  with extremely bad one,  $\mathbf{x}_0 = 100 * \mathbf{w}_0$ , where  $\mathbf{w}_0$  is a randomly generated vector  $\mathbf{w}_0$  and  $\mathbf{w}_0 \sim \mathcal{N}(\mathbf{0}, \mathbf{I})$ , AdaGrad-Norm takes much more iterations than before. However, after tuning  $\eta = 10000$  in stochastic setting and  $\eta = 100$  in batch setting, the convergence rate of AdaGrad-Norm is better again. In this case,  $b_0$  plays a small role.

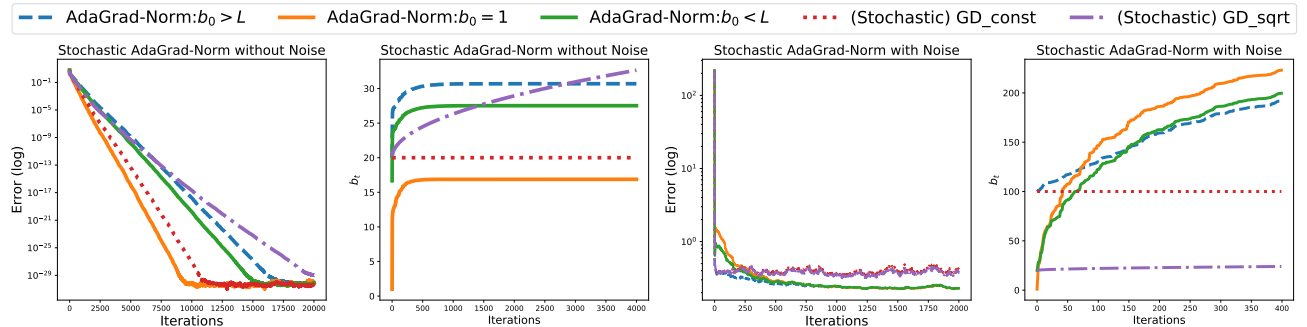

Figure 6: Error and growth of  $b_t$  with  $\mathbf{x}_0 = \mathbf{0}$  and  $\eta = 1$  in stochastic setting.



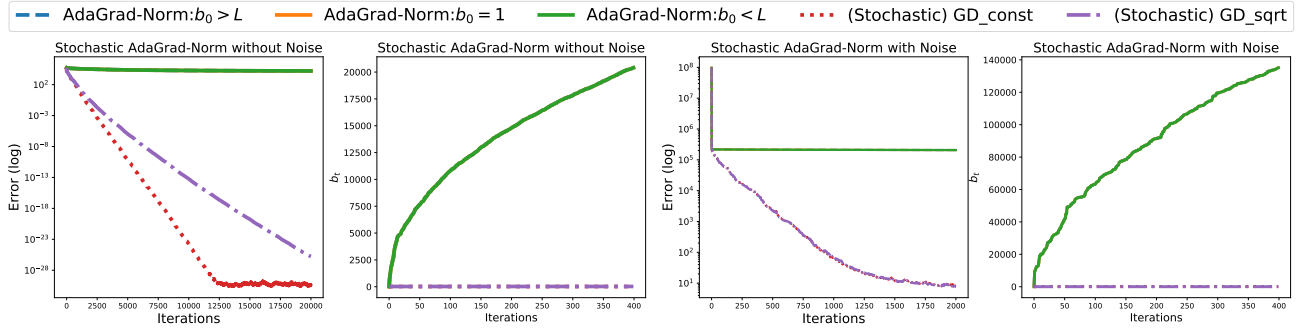

Figure 7: Error and growth of  $b_t$  with extremely bad initialization and  $\eta = 1$  in stochastic setting.

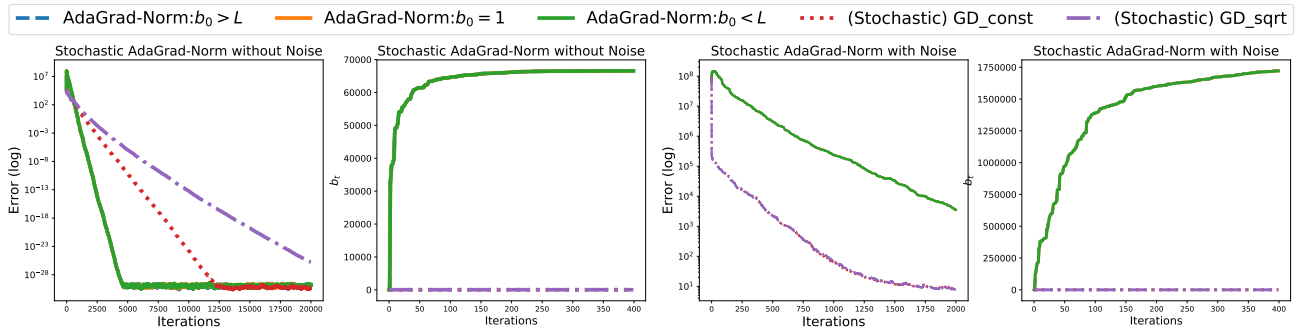

Figure 8: Error and growth of  $b_t$  with extremely bad initialization and tuning  $\eta = \Theta(\|\mathbf{x}_0 - \mathbf{x}^*\|^2)$  in stochastic setting.

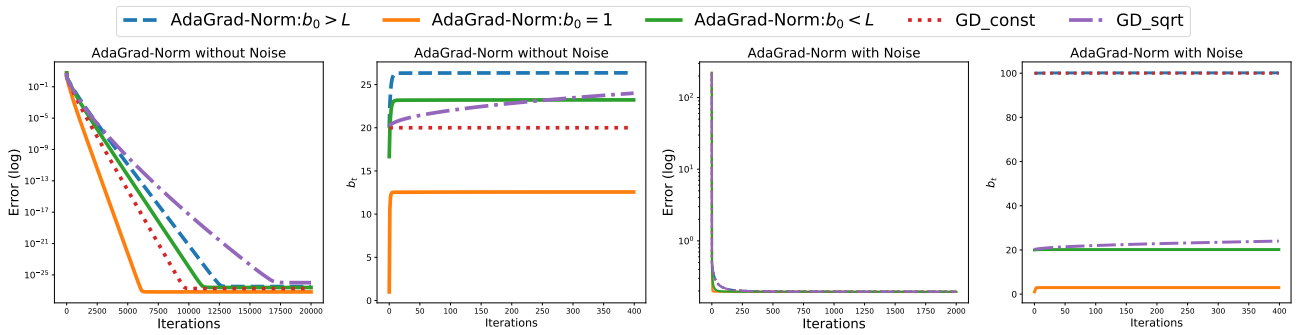

Figure 9: Error and growth of  $b_t$  with  $\mathbf{x}_0 = \mathbf{0}$  and  $\eta = 1$  in batch setting.

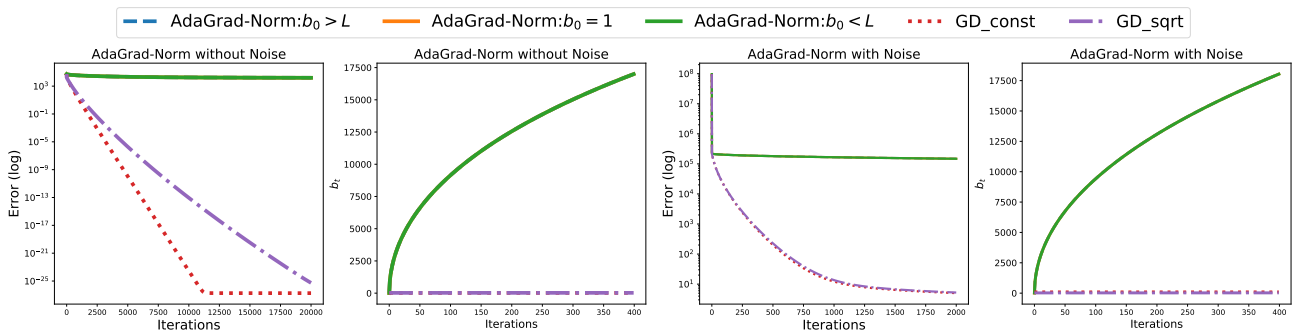

Figure 10: Error and growth of  $b_t$  with extremely bad initialization and  $\eta = 1$  in batch setting.

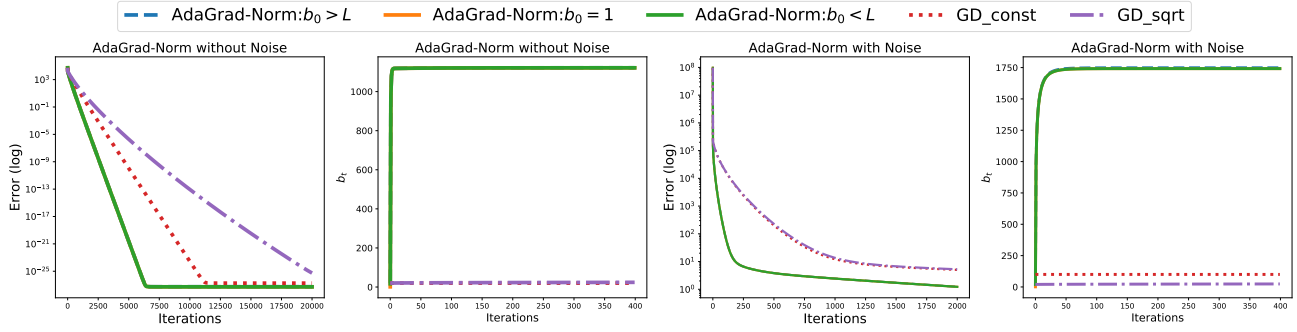

Figure 11: Error and growth of  $b_t$  with extremely bad initialization and tuning  $\eta = \Theta(\|\mathbf{x}_0 - \mathbf{x}^*\|)$  in batch setting.

## E.2 Numerical Experiment of Two Layer Neural Networks

We implement AdaGrad-Norm in a two-layer network. The experiment is mainly to show the stochastic AdaGrad-Norm (black curve) converges with a linear rate. We first define loss function as in Du et al. (2019):

$$L(\mathbf{W}) = \frac{1}{2n} \sum_{i=1}^n \left( \frac{1}{\sqrt{m}} \sum_{r=1}^m a_r \sigma(\langle \mathbf{w}_r(k), \mathbf{x}_i \rangle) - y_i \right)^2$$

where  $\sigma$  is a ReLU activation function;  $n$  is size of data;  $m$  is the width for the one-hidden layer. For our implementation, we set  $n = 100$ ,  $m = 200$  and  $d = 10$ . Set mini-batch size 20 for each iteration and the effective stepsize of AdaGrad-Norm with  $100/b_t$  and  $b_0 = 0.1$ . We also run vanilla SGD (blue curve) with  $\eta_t = 100$ . For details, see the code here <sup>4</sup>. Figure 12 (left) clearly illustrates that AdaGrad-Norm (black curve) converges linearly. Figure 12 (right) shows the norm of the gradients at the first few iterations by AdaGrad-Norm are often big enough to accumulate to exceed  $\eta L$ , which empirically verifies Assumption (A3).

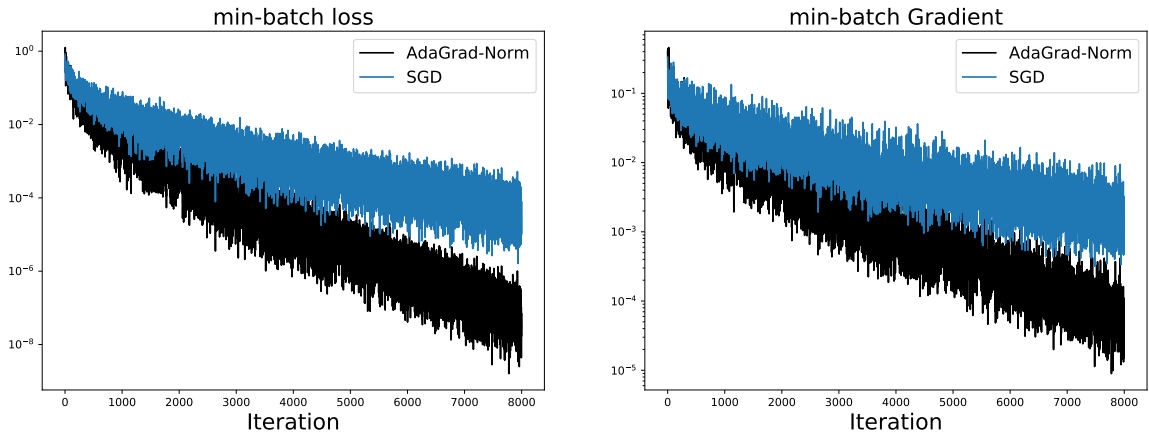

Figure 12: Error and the norm of gradient in a two-layer neural network

<sup>4</sup><https://colab.research.google.com/drive/1kv-XwUxvSogVfNyT02w1aAoq1S2chlYH>
